# Supplementary material for: Antimicrobial Stewardship from Health Professionals’ Perspective: Awareness, Barriers, and Level of Implementation of the Program
Source: Antibiotics (Basel). 2022 Jan 14;11(1):99. doi: 10.3390/antibiotics11010099 (PMC8773352; doi:10.3390/antibiotics11010099)
Supplement: Supplementary file 1 [file antibiotics-11-00099-s001.zip › antibiotics-1522325-supplementary.pdf]

## Study Questionnaire

# Antimicrobial Stewardship from health professionals' perspective: Awareness, barriers, and level of implementation of the program

### Informed Consent Form

#### Dear participant

Researchers from Applied Science Private University are carrying out a research project with the purpose of evaluating the extent of the antimicrobial stewardship practice in Jordanian tertiary hospitals from healthcare providers' (physicians, pharmacists, and nurses) perspective.

For confidentiality, the surveys will not include information identifying your personal identity and will be used only for research purposes.

The procedure involves filling an online survey that will take approximately five minutes. Your participation is highly appreciated.

**ELECTRONIC CONSENT:** Please select your choice below.

Clicking on the "agree" button below indicates that:

1. You have read the above information
2. You voluntarily agree to participate

If you do not wish to participate in the research study, please decline participation by clicking on the "disagree" button.

- ☐ Agree
- ☐ Disagree

### Part 1: Demographic characteristics of healthcare providers

Age: \_\_\_\_\_ (years)

Gender:

- ☐ Male
- ☐ Female

Healthcare discipline

- ☐ Physician
- ☐ Pharmacist
- ☐ Nurse

Experience in your current specialty or profession:

\_\_\_\_\_

Hospital facility classification

- ☐ Public
- ☐ Private

Name of the hospital: \_\_\_\_\_

Hospital facility location

- ☐ North region (Irbid, Ajloun, Jerash, Mafraq)
- ☐ Central region (Amman, Zarqa, Balqa, Madaba)
- ☐ South region (Karak, Tafilah, Ma'an, Aqaba)

Are you aware about the presence of the National Action Plan on antimicrobial stewardship (2018–2022) in Jordan?

- ☐ Yes
- ☐ No

### Assessment of antimicrobial stewardship practice in hospital settings

#### Definition

Antimicrobial stewardship refers to a coordinated intervention designed to improve the appropriate use of antibiotics by promoting the selection of optimal antimicrobial drug regimen, dose, duration of therapy and route of administration

#### Organizational structure

Does your hospital have an antimicrobial stewardship committee?

- ☐ Yes
- ☐ No
- ☐ Not sure

Does your hospital have a policy that requires prescribers to document in the medical record of during entry a dose, duration, and indication for all antibiotic prescriptions?

- ☐ Yes

- ☐ No
- ☐ Not sure

Based on national guidelines and local susceptibility, does your hospital have a hospital-specific treatment recommendation (guideline)?

- ☐ Yes
- ☐ No
- ☐ Not sure

Please choose the available antibiotic stewardship strategy in your hospitals (Multiple answers is possible)

- ☐ Treatment guidelines
- ☐ Surgical prophylaxis guidelines
- ☐ Antimicrobial cycling
- ☐ Prospective audit feedback
- ☐ Antimicrobial formulary
- ☐ Intravenous-to-oral switch guidance
- ☐ Empiric usage form
- ☐ Restricted antimicrobial list
- ☐ Streamlining or de-escalation of therapy
- ☐ Pre-authorized pharmacy-driven dose optimization (e.g., automatic renal dose adjustments, intravenous-to-oral conversions, etc.)
- ☐ Infectious diseases/microbiology advice by telephone
- ☐ Infectious diseases/microbiology advice on ward rounds
- ☐ Separate antimicrobial chart or section

Does your hospital use antimicrobial resistance levels/surveillance reports?

- ☐ Yes
- ☐ No
- ☐ Not sure

Does your facility have software to record antimicrobial susceptibility results?

- ☐ Yes
- ☐ No
- ☐ Not sure

Does your facility have any antimicrobial use reports?

- ☐ Yes
- ☐ No
- ☐ Not sure

Does your hospital provide access to literature or evidence-based medicine for medical staff while delivering care?

- ☐ Yes

- ☐ No
- ☐ Not sure

Does your stewardship program provide education to prescribers and other relevant staff on optimal prescribing, adverse reactions from antibiotics, and antibiotic resistance?

- ☐ Yes
- ☐ No
- ☐ Not sure

### Perceived importance of antimicrobial stewardship

Please choose the level of agreement with the following statements, reflecting the importance of antimicrobial stewardship implementation in the hospital setting.

| Statements                                                                        | Strongly agree           | Agree                    | Neutral                  | Disagree                 | Strongly disagree        |
|-----------------------------------------------------------------------------------|--------------------------|--------------------------|--------------------------|--------------------------|--------------------------|
| Antimicrobial stewardship will improve patient's clinical outcomes                | <input type="checkbox"/> |
| Antimicrobial stewardship will reduce antimicrobial resistance                    | <input type="checkbox"/> |
| Antimicrobial stewardship improves the cost-effectiveness of health care sectors  | <input type="checkbox"/> |
| Antimicrobial stewardship improves the collaboration between healthcare providers | <input type="checkbox"/> |

### Barriers to delivering a functional and effective antimicrobial stewardship

Please choose the level of agreement with the following statements, reflecting the barriers of antimicrobial stewardship implementation in the hospital setting.

| Statements                                                 | Strongly agree           | Agree                    | Neutral                  | Disagree                 | Strongly disagree        |
|------------------------------------------------------------|--------------------------|--------------------------|--------------------------|--------------------------|--------------------------|
| Lack of sufficient healthcare providers                    | <input type="checkbox"/> |
| Lack of funding                                            | <input type="checkbox"/> |
| The hospital administration is not aware of AMS program    | <input type="checkbox"/> |
| The antimicrobial Prescribers are not aware of AMS program | <input type="checkbox"/> |
| Opposition from prescribers                                | <input type="checkbox"/> |
| Lack of information technology support                     | <input type="checkbox"/> |
| Lack of resources to get the needed data                   | <input type="checkbox"/> |
